# Supplementary material for: Functional Significance of Conserved Cysteines in the Extracellular Loops of the ATP Binding Cassette Transporter Pdr11p
Source: PubMed Central journal article supplement (PMC7822014; doi:10.3390/jof7010002), 2020-12-22
Supplement: jof-07-00002-s001.pdf [file jof-07-00002-s001.pdf]

**Functional significance of conserved cysteines in the extracellular loops of the ATP binding cassette transporter Pdr11p**

*Lyubomir Dimitrov Stanchev<sup>1,2</sup>, Magdalena Marek<sup>2,4</sup>, Feng Xian<sup>3</sup>, Mara Klöhn<sup>1</sup>, Daniele Silvestro<sup>2</sup>, Gunnar Dittmar<sup>3</sup>, Rosa L. López-Marqués<sup>2</sup>, Thomas Günther Pomorski<sup>1,2</sup>*

**Supplementary Information**

This file includes all supplementary tables S1-S4 and **supplementary figure S1** for the manuscript.

**Supplementary Table S1.** Yeast strains used in this study.

| <b>Strain</b>                                  | <b>Genotype</b>                                                                                                 | <b>Source</b>                                |
|------------------------------------------------|-----------------------------------------------------------------------------------------------------------------|----------------------------------------------|
| W303                                           | <i>MATa ade2-1 his3-11,15 leu2-3,112 trp1-1 ura3-1 can1-100</i>                                                 | Roland Lill, Philipps<br>Universität Marburg |
| <i>hem1Δ</i>                                   | W303 <i>hem1Δ::LEU2</i>                                                                                         | [13]                                         |
| <i>hem1Δaus1Δpdr11Δ</i>                        | W303 <i>hem1Δ::LEU2 pdr11Δ::loxP aus1Δ::loxP-HIS5Sp-loxP</i>                                                    | [13]                                         |
| <i>hem1Δaus1Δpdr11Δ-PDR11</i>                  | W303 <i>hem1Δ::LEU2 pdr11Δ::loxP aus1Δ::loxP-HIS5Sp-loxP ura3Δ::caURA3 ADHI-FLAG-PDR11-GFP</i>                  | This study                                   |
| <i>hem1Δaus1Δpdr11Δ-PDR11<sup>C582S</sup></i>  | W303 <i>hem1Δ::LEU2 pdr11Δ::loxP aus1Δ::loxP-HIS5Sp-loxP ura3Δ::caURA3 ADHI-FLAG-PDR11<sup>C582S</sup>-GFP</i>  | This study                                   |
| <i>hem1Δaus1Δpdr11Δ-PDR11<sup>C603S</sup></i>  | W303 <i>hem1Δ::LEU2 pdr11Δ::loxP aus1Δ::loxP-HIS5Sp-loxP ura3Δ::caURA3 ADHI-FLAG-PDR11<sup>C603S</sup>-GFP</i>  | This study                                   |
| <i>hem1Δaus1Δpdr11Δ-PDR11<sup>C1290S</sup></i> | W303 <i>hem1Δ::LEU2 pdr11Δ::loxP aus1Δ::loxP-HIS5Sp-loxP ura3Δ::caURA3 ADHI-FLAG-PDR11<sup>C1290S</sup>-GFP</i> | This study                                   |
| <i>hem1Δaus1Δpdr11Δ-PDR11<sup>C1306S</sup></i> | W303 <i>hem1Δ::LEU2 pdr11Δ::loxP aus1Δ::loxP-HIS5Sp-loxP ura3Δ::caURA3 ADHI-FLAG-PDR11<sup>C1306S</sup>-GFP</i> | This study                                   |
| <i>hem1Δaus1Δpdr11Δ-PDR11<sup>C1330S</sup></i> | W303 <i>hem1Δ::LEU2 pdr11Δ::loxP aus1Δ::loxP-HIS5Sp-loxP ura3Δ::caURA3 ADHI-FLAG-PDR11<sup>C1330S</sup>-GFP</i> | This study                                   |
| <i>hem1Δaus1Δpdr11Δ-PDR11<sup>C1333S</sup></i> | W303 <i>hem1Δ::LEU2 pdr11Δ::loxP aus1Δ::loxP-HIS5Sp-loxP ura3Δ::caURA3 ADHI-FLAG-PDR11<sup>C1333S</sup>-GFP</i> | This study                                   |

**Supplementary Table S2.** Plasmids used in this study.

| Plasmids                                       | Template/Purpose                           | Source     |
|------------------------------------------------|--------------------------------------------|------------|
| pESC-URA-FLAG-PDR11                            |                                            | [9]        |
| pESC-URA-FLAG-PDR11-GFP                        |                                            | [9]        |
| pESC-URA-FLAG-PDR11 <sup>C582S</sup> -GFP      | pESC-URA-FLAG-PDR11-GFP                    | This study |
| pESC-URA-FLAG-PDR11 <sup>C603S</sup> -GFP      | pESC-URA-FLAG-PDR11-GFP                    | This study |
| pESC-URA-FLAG-PDR11 <sup>C1290S</sup> -GFP     | pESC-URA-FLAG-PDR11-GFP                    | This study |
| pESC-URA-FLAG-PDR11 <sup>C1306S</sup> -GFP     | pESC-URA-FLAG-PDR11-GFP                    | This study |
| pESC-URA-FLAG-PDR11 <sup>C1330S</sup> -GFP     | pESC-URA-FLAG-PDR11-GFP                    | This study |
| pESC-URA-FLAG-PDR11 <sup>C1333S</sup> -GFP     | pESC-URA-FLAG-PDR11-GFP                    | This study |
| pESC-URA-FLAG-PDR11 <sup>C582S</sup>           | pESC-URA-FLAG-PDR11                        | This study |
| pESC-URA-FLAG-PDR11 <sup>C603S</sup>           | pESC-URA-FLAG-PDR11                        | This study |
| pESC-URA-FLAG-PDR11 <sup>C1290S</sup>          | pESC-URA-FLAG-PDR11                        | This study |
| pESC-URA-FLAG-PDR11 <sup>C1306S</sup>          | pESC-URA-FLAG-PDR11                        | This study |
| pESC-URA-FLAG-PDR11 <sup>C1330S</sup>          | pESC-URA-FLAG-PDR11                        | This study |
| pESC-URA-FLAG-PDR11 <sup>C1333S</sup>          | pESC-URA-FLAG-PDR11                        | This study |
| pVW126-pCYC                                    | Vector backbone                            | [10]       |
| pSIV340-pADH1                                  | Amplification of <i>ADH1</i> promoter      | [10]       |
| pVW126-pCYC-FLAG-PDR11-GFP                     | pESC-URA-FLAG-PDR11-GFP                    | This study |
| pVW126-pADH1-FLAG-PDR11-GFP                    | pESC-URA-FLAG-PDR11-GFP                    | This study |
| pVW126-pADH1-FLAG-PDR11 <sup>C582S</sup> -GFP  | pESC-URA-FLAG-PDR11 <sup>C582S</sup> -GFP  | This study |
| pVW126-pADH1-FLAG-PDR11 <sup>C603S</sup> -GFP  | pESC-URA-FLAG-PDR11 <sup>C603S</sup> -GFP  | This study |
| pVW126-pADH1-FLAG-PDR11 <sup>C1290S</sup> -GFP | pESC-URA-FLAG-PDR11 <sup>C1290S</sup> -GFP | This study |
| pVW126-pADH1-FLAG-PDR11 <sup>C1306S</sup> -GFP | pESC-URA-FLAG-PDR11 <sup>C1306S</sup> -GFP | This study |
| pVW126-pADH1-FLAG-PDR11 <sup>C1330S</sup> -GFP | pESC-URA-FLAG-PDR11 <sup>C1330S</sup> -GFP | This study |
| pVW126-pADH1-FLAG-PDR11 <sup>C1333S</sup> -GFP | pESC-URA-FLAG-PDR11 <sup>C1333S</sup> -GFP | This study |

**Supplementary Table S3.** Oligonucleotides used in this study

| Name                 | Oligonucleotide                                                                            | Purpose                                                                                                                                                                                                              |
|----------------------|--------------------------------------------------------------------------------------------|----------------------------------------------------------------------------------------------------------------------------------------------------------------------------------------------------------------------|
| F_ADH1<br>R_ADH1     | GGGCGAATTGGAGCTCATCCTTTTGTGTTTCCGGG<br>CATCCTTGTAATCCATAGTTGATTGTATGCTTGGTAT               | Amplification of <i>pADH1</i> from pSIV340 to clone in pVW126                                                                                                                                                        |
| F_pSIV3<br>R_pSIV2   | ATGGATTACAAGGATGACGA<br>ACTCGAGTTAGGATCCTTACTTGTACAGCTCGTCCATG                             | Amplification of FLAG-PDR11*-GFP cassettes from pESC-URA- FLAG-PDR11*-GFP for cloning into pVW126                                                                                                                    |
| F_C1<br>R_C1         | ACCTGAAACTAGACa <b>G</b> TCATGAAAGTATTATTCC<br>GGAATAATACTTTCATGAc <b>t</b> GTCTAGTTTCAGGT | Mutagenesis of <i>PDR11</i> <sup>C582S</sup>                                                                                                                                                                         |
| F_C2<br>R_C2         | AGTCATAAAGCTa <b>G</b> TGCCTGGCAAGGC<br>GCCTTGCCAGGC <b>A</b> cTAGCTTTATGACT               | Mutagenesis of <i>PDR11</i> <sup>C603S</sup>                                                                                                                                                                         |
| F_C3<br>R_C3         | AGAGAAGTAAACa <b>G</b> CTCGACAAGTGAA<br>TTCACTTGTTCGAG <b>C</b> tGTTTACTTCTCT              | Mutagenesis of <i>PDR11</i> <sup>C1290S</sup>                                                                                                                                                                        |
| F_C4<br>R_C4         | ATGGGTCAAACCa <b>G</b> CGGTCAGTTTATG<br>CATAAACTGACCG <b>C</b> tGGTTTGACCCAT               | Mutagenesis of <i>PDR11</i> <sup>C1306S</sup>                                                                                                                                                                        |
| F_C5<br>R_C5         | ACATACACCGT <b>C</b> a <b>G</b> CGCTACTGCATGT<br>ACATGCAGTAGGCG <b>C</b> tGACGGTGTATGT     | Mutagenesis of <i>PDR11</i> <sup>C1330S</sup>                                                                                                                                                                        |
| F_C6<br>R_C6         | GTCTGCGCCTACa <b>G</b> CATGTACTCTGT<br>AACAGTGTACAT <b>G</b> CtGTAGGCGCAGAC                | Mutagenesis of <i>PDR11</i> <sup>C1333S</sup>                                                                                                                                                                        |
| Cys1-2_F<br>Cys1-2_R | ATTTTTGCATGGTGTCACTATTTGCATTAAC<br>AAGGGACAGTATCTTTTGAGATAGTTATTCCAG                       | Sequencing of <i>PDR11</i> <sup>C582S</sup> and <i>PDR11</i> <sup>C603S</sup> integrated in the chromosome to confirm introduced point mutations                                                                     |
| Cys3-6_F<br>Cys3-6_R | ATTTGGGTTGTGGCTTCTATATTCTGC<br>CCATCAATCACAGAAGGCCAAATTTTTTTGA                             | Sequencing of <i>PDR11</i> <sup>C1290S</sup> , <i>PDR11</i> <sup>C1306S</sup> , <i>PDR11</i> <sup>C1330S</sup> and <i>PDR11</i> <sup>C1333S</sup> integrated in the chromosome to confirm introduced point mutations |
| Int_F<br>Int_R       | ATGGACGAGCTGTACAAGTAAGG<br>TTGGAACCTCTTGTGTTCTTTGGA                                        | Confirmation of FLAG-PDR11*-GFP cassettes integration in the chromosome                                                                                                                                              |
| Int2_F<br>Int2_R     | AAGTTATCTGATGTAGAAAAGGATTAAGATG<br>ACCAATATATTGTTTCTTTACGGTATTACC                          | Confirmation of FLAG-PDR11*-GFP cassettes integration in the chromosome                                                                                                                                              |

\*Wild type *PDR11* or single cysteine mutants *C582S*, *C603S*, *C1290S*, *C1306S*, *C1330S* or *C1333S*

#Mutated nucleotides are indicated in lowercase. Changed amino acids have codons indicated in boldface type.

**Supplementary Table S4.** List of targeted peptides for LC-MS/MS analysis

| Mass [m/z]  | Charge state | Polarity | Start [min] | End [min] | NCE | Peptide sequence                                                   |
|-------------|--------------|----------|-------------|-----------|-----|--------------------------------------------------------------------|
| 848.399021  | 2            | Positive | 0           | 85        | 28  | AC[+71.037114]AWQGATLGNDYVR (light)                                |
| 841.391196  | 2            | Positive | 0           | 85        | 28  | AC[+57.021464]AWQGATLGNDYVR (light)                                |
| 389.543655  | 3            | Positive | 0           | 85        | 28  | LDSHESIIPR (light)                                                 |
| 418.548412  | 3            | Positive | 0           | 85        | 28  | LDC[+71.037114]HESIIPR (light)                                     |
| 413.876528  | 3            | Positive | 0           | 85        | 28  | LDC[+57.021464]HESIIPR (light)                                     |
| 804.891886  | 2            | Positive | 0           | 85        | 28  | ASAWQGATLGNDYVR (light)                                            |
| 1255.241873 | 3            | Positive | 0           | 85        | 30  | EVNSSTSEMVPSPVPMGQTC[+71.037114]GQFMKPFIDEFGGK (light)             |
| 1250.56999  | 3            | Positive | 0           | 85        | 30  | EVNSSTSEMVPSPVPMGQTC[+57.021464]GQFMKPFIDEFGGK (light)             |
| 1255.241873 | 3            | Positive | 0           | 85        | 30  | EVNC[+71.037114]STSEMVPSPVPMGQTSGQFMKPFIDEFGGK (light)             |
| 1250.56999  | 3            | Positive | 0           | 85        | 30  | EVNC[+57.021464]STSEMVPSPVPMGQTSGQFMKPFIDEFGGK (light)             |
| 1284.24663  | 3            | Positive | 0           | 85        | 30  | EVNC[+71.037114]STSEMVPSPVPMGQTC[+71.037114]GQFMKPFIDEFGGK (light) |
| 1279.574746 | 3            | Positive | 0           | 85        | 30  | EVNC[+71.037114]STSEMVPSPVPMGQTC[+57.021464]GQFMKPFIDEFGGK (light) |
| 1279.574746 | 3            | Positive | 0           | 85        | 30  | EVNC[+57.021464]STSEMVPSPVPMGQTC[+71.037114]GQFMKPFIDEFGGK (light) |
| 1274.902863 | 3            | Positive | 0           | 85        | 30  | EVNC[+57.021464]STSEMVPSPVPMGQTC[+57.021464]GQFMKPFIDEFGGK (light) |

## Supplementary Figure

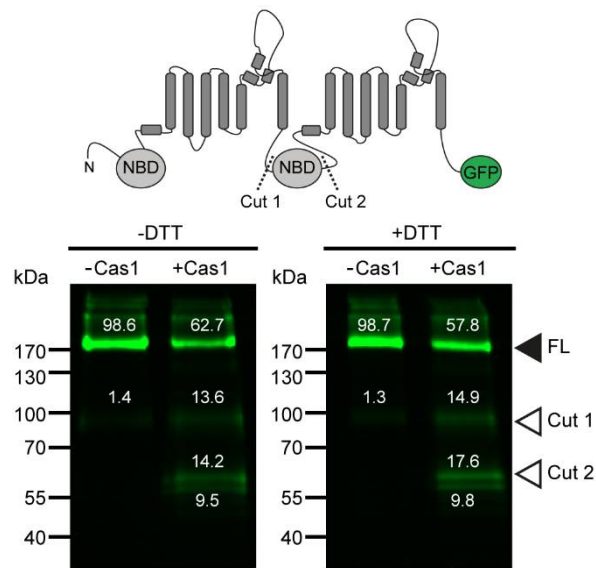

**Supplementary Figure S1.** Analysis of Pdr11p-GFP after limited proteolysis under reducing or non-reducing conditions. Purified full-length (FL) Pdr11p-GFP (filled arrowhead) was incubated in the absence (-Cas1) and presence (+Cas) of caspase-1 and subsequently analysed after SDS-PAGE by in-gel fluorescence imaging. Before SDS-PAGE, the samples were incubated 30 min at 37°C in SDS loading buffer without (-DTT) or with (+DTT) 50 mM dithiothreitol. Cut 1 and Cut 2 (open arrowheads) correspond to caspase-1 recognition sites D724 and D876, respectively. Number insets indicate the relative GFP fluorescence intensity (%) for the protein bands in each lane. Results are representative of at least three independent experiments. NBD, nucleotide binding domain.
